# Supplementary material for: The Effect of Molecular Crowding on the Stability of Human c-MYC Promoter Sequence I-Motif at Neutral pH
Source: PubMed Central journal article supplement (PMC6270392; doi:10.3390/molecules181012751), 2013-10-15

## Supplementary Materials

**Figure S1.** CD spectra for the c-MYC mutant promoter sequence i-motif DNA construct in BPES buffer with added glycerol (20% w/w). **Red line (—):** the CD spectra of the DNA structure at pH 4.0. **Blue line (—):** the CD spectra of the DNA structure at pH 4.5. **Purple line (—):** the CD spectra of the DNA structure at pH 5.0. **Yellow line (—):** the CD spectra of the DNA structure at pH 5.5. **Green line (—):** the CD spectra of the DNA structure at pH 6.0. **Orange line (—):** the CD spectra of the DNA structure at pH 6.5; **Black line (—):** the CD spectra of the DNA structure at pH 7.0.

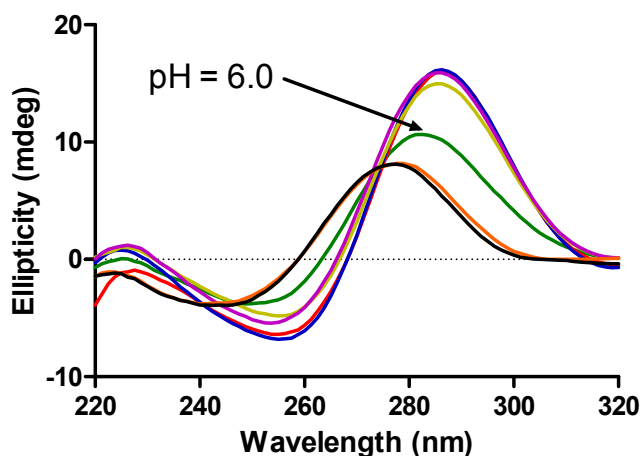

Results of the DSC melting experiments for the mutant c-MYC i-motif forming sequence in 0%, 10%, 20% and 30% w/w PEG<sub>12000</sub> containing buffer solutions at pH 5.0 and 6.0 are summarized in Table S1. The DSC results show that at both pH 5.0 and 6.0, the stability of the i-motif, in terms of melting temperature, increases as the concentration of PEG<sub>12000</sub> increases. This observation is consistent with the results of the i-motif stability in PEG<sub>8000</sub> containing buffers with PEG concentrations from 0% to 30%.

**Table S1.** The DSC determined melting temperatures,  $T_m$ s of the i-motif structure formed in 0%, 10%, 20% and 30% w/w PEG<sub>12000</sub> solutions at pH 5.0 and 6.0.

| % PEG <sub>12000</sub> | $T_m$ of oligonucleotide in pH 5.0 solutions | $T_m$ of oligonucleotide in pH 6.0 solutions |
|------------------------|----------------------------------------------|----------------------------------------------|
| 0                      | 41.5                                         | 23.0                                         |
| 10                     | 44.9                                         | 26.4                                         |
| 20                     | 48.5                                         | 36.8                                         |
| 30                     | 51.0                                         | 46.7                                         |

If we compare the  $T_m$ s of the c-MYC i-motif in two different PEG containing buffers (PEG<sub>8000</sub> and PEG<sub>12000</sub>), but having the same concentration and the same pH values, we see that at the same concentration (20% or 30% w/w), PEG<sub>8000</sub> exhibits the better stabilization of the i-motif in pH 5.0 solutions, while PEG<sub>12000</sub> exhibits the better stabilization of the i-motif at pH 6.0. The  $T_m$  data in Table 2 in combination with the  $T_m$  data in Table S1 show that at pH = 5.0, the melting of the c-MYC i-motif occurs 1.5 to 2.1°C lower in 20% PEG<sub>12000</sub> solutions than in 20% PEG<sub>8000</sub> solutions. In contrast, at pH = 6.0, the melting of the c-MYC i-motif occurs approximately 4°C higher in 20% PEG<sub>12000</sub> solutions than in 20% PEG<sub>8000</sub> solutions. All of the DSC melting experiments done in the

PEG<sub>12000</sub> show the presence of a second higher melting peak in the thermogram that we have attributed to the disassociation or unfolding of a DNA/PEG complex (see Figure 3).

CD spectra for pH titration experiments done on the mutant c-MYC promoter sequence in 0%–30% w/w PEG<sub>12000</sub> containing buffer solutions are shown in Figure S2. The CD results show that in 10%, 20% and 30% PEG<sub>12000</sub> solutions, the highest pH at which a stable i-motif occurs in each of these solutions is approximately pH = 6.1, pH = 6.2, or pH = 6.3. Again, these results in terms of i-motif stabilization as a function of PEG concentration are similar for PEG<sub>8000</sub> and PEG<sub>12000</sub>.

**Figure S2.** CD spectra for pH titration experiments done for the mutant c-MYC promoter sequence in 0-30% w/w PEG<sub>12000</sub> containing buffer solutions.

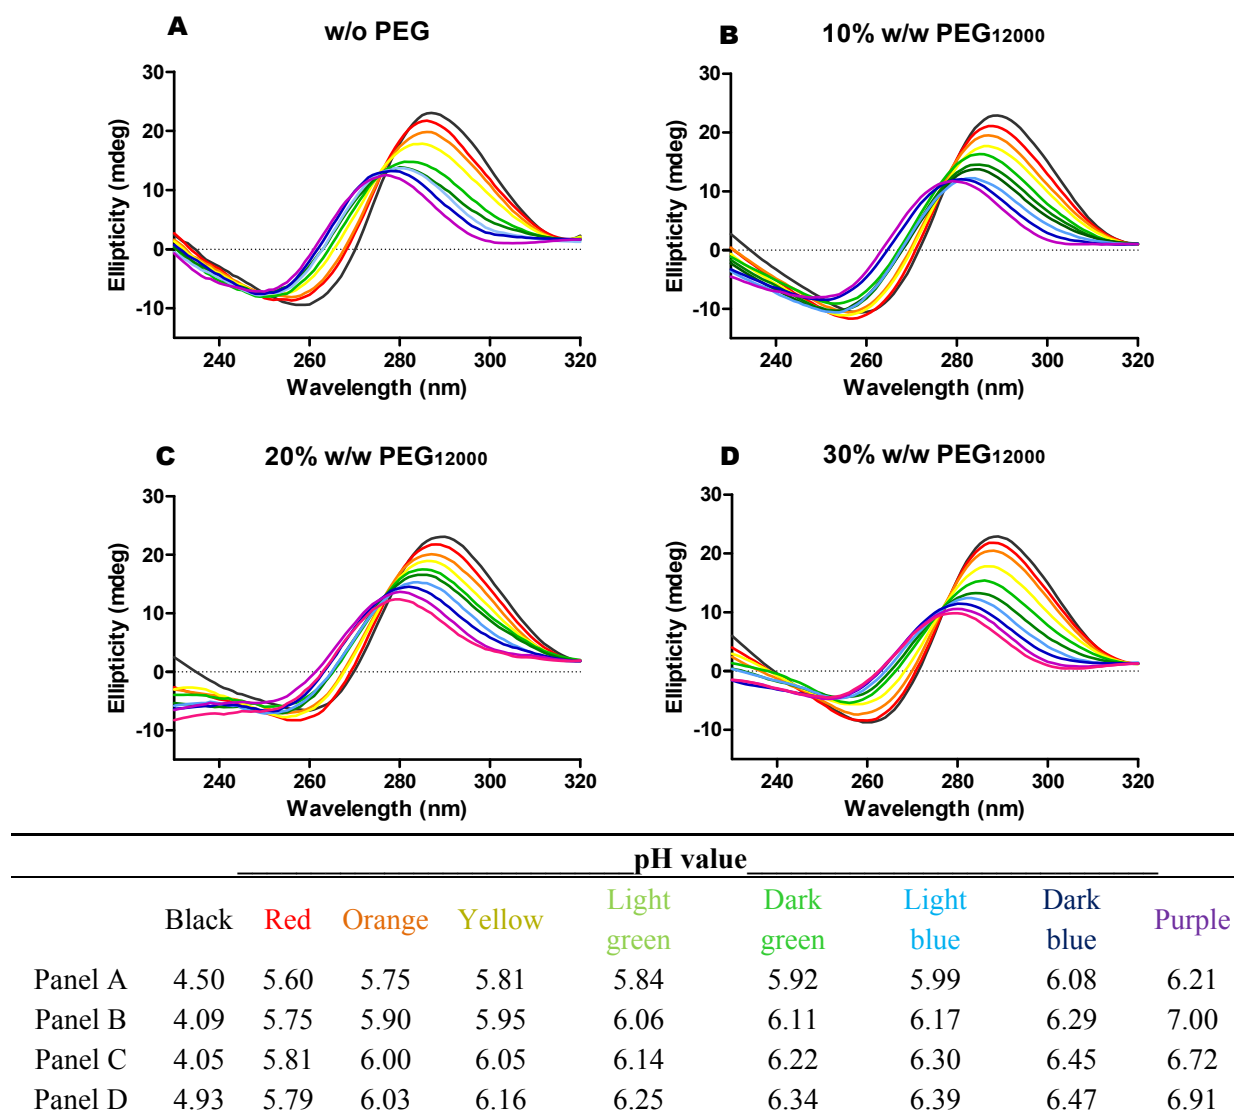

Supplement: molecules-18-12751-s001.pdf [file molecules-18-12751-s001.pdf]
